# Supplementary material
Source: publisher site journal article supplement (https://www.dovepress.com/article/414438)
Supplement: Supplementary file 1 [file get_supplementary_file.php]

**Supplementary Material**

# Short-term intravenous administration of carbon nano-onions is non-toxic in female mice

Yi Zhen Tan1, Lucy R Thomsen1, Nensi Shrestha1, Adalberto Camisasca2, Silvia Giordani2, Rhonda Rosengren1 *

1 Department of Pharmacology and Toxicology, University of Otago, Dunedin 9016, New Zealand.

2 School of Chemical Sciences, Dublin City University, Glasnevin, D09 NA55 Dublin, Ireland.

*Correspondence:

Rhonda Rosengren

Department of Pharmacology and Toxicology, 18 Frederick Street, Dunedin 9016, New Zealand.

Tel: +64 3 479 9141

Fax: +64 3 479 9140

Email: rhonda.rosengren@otago.ac.nz

## Methods

### Size characterization

Dynamic light scattering was performed on the Zetasizer® Nano ZS (ZEN3600, Malvern Instrument) with an He-Ne laser (wavelength, λ= 633 nm) and measurement angle of 173° (non-invasive blackscatter, NIBS® system). The oxi-CNO dispersion was transferred (without filtration) to a disposable acrylic semi-micro cuvette. A refractive index of 1.333 and viscosity of 1.0 cP were set for ultrapure water, while a refractive index of 1.400 and viscosity of 32.0 cP were set for 50% w/v PEG. The samples were allowed to equilibrate for a duration of 120 s at 20°C prior to measurement. All samples were analyzed by the Zetasizer® software (version 7.03, Malvern Instrument) to determine the hydrodynamic diameter (Z-average size) and intensity-weighted size distribution. Each sample was examined in triplicate consecutively, with an average of 14 runs per measurement.

Table S1: Body weight and organ weight of the mice following treatment with oxi-CNOs

|  | Unt | Veh | 125 µg | 250 µg | 500 µg |
| --- | --- | --- | --- | --- | --- |
| Single-dose |  |  |  |  |  |
| ∆ Body weight **a** | 0.760.22 | -0.060.26 | -0.280.21 | 0.080.38 | 0.140.22 |
| ∆ Body weight | 3.941.23 | -0.291.37 | -1.561.21 | 0.411.97 | 0.691.12 |
| Liver | 4.400.13 | 4.700.18 | 4.600.09 | 4.600.04 | 4.600.04 |
| Spleen | 0.350.01 | 0.370.02 | 0.390.01 | 0.370.01 | 0.370.01 |
| Lungs | 1.570.11 | 1.650.05 | 1.480.11 | 1.370.03 | 1.610.15 |
| Kidneys | 1.330.08 | 1.300.04 | 1.250.05 | 1.320.02 | 1.250.04 |
| Multiple-dose |  |  |  |  |  |
| ∆ Body weight **a** | 1.160.16 | -0.360.29 * | -0.020.17 * | -0.680.13 * | -0.620.41 * |
| ∆ Body weight | 5.820.83 | -1.711.40 * | -0.080.96 * | -3.650.63 * | -2.711.74 * |
| Liver | 4.940.05 | 4.650.15 | 4.790.16 | 4.920.10 | 5.080.05 |
| Spleen | 0.370.02 | 0.370.02 | 0.410.02 | 0.410.01 | 0.400.01 |
| Lungs | 1.500.04 | 1.370.18 | 1.510.05 | 1.540.05 | 1.410.13 |
| Kidneys | 1.210.03 | 1.330.02 | 1.270.04 | 1.330.04 | 1.340.05 |

Notes: Data are presented as the mean ± SEM of values expressed as % body weight unless stated otherwise, with n=5 mice per group. aValues expressed as g. Significance was determined with a one-way ANOVA coupled with a Tukey’s *post-hoc* test. *significantly decreased compared to untreated mice, p<0.05.

Abbreviations: Unt, untreated; Veh, vehicle control.

Table S2:Hydrodynamic diameter obtained from DLS measurements of oxi-CNOs dispersed in ultrapure water

| Dispersant | Concentration  (µg/mL) | Z-average size  (d. nm) |
| --- | --- | --- |
| 50% w/v PEG | 125 | 47.3±1.84 |
|  | 250 | 73.5±1.40 |
|  | 500 | 54.8±1.82 |
| Ultrapure water | 50 | 136.8±0.26 |
| 100 | 138.1±0.38 |
| 200 | 143.6±0.33 |

Notes: Hydrodynamic diameter is expressed in terms of Z-average size ± SEM. Each sample was run in triplicate consecutively, with the accumulation of an average of 14 runs per measurement.


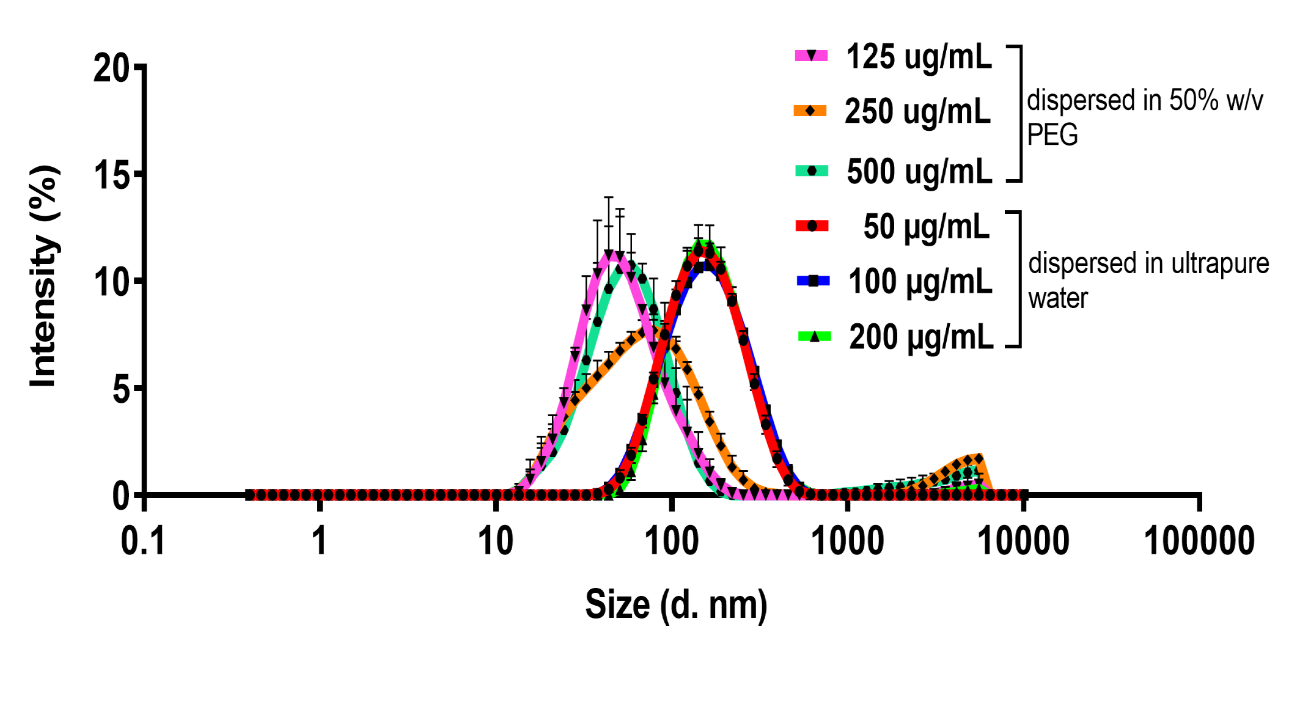


Figure S1: Intensity-weighted size distribution of oxi-CNOs dispersed in 50% w/v PEG or ultrapure water. Each sample was run in triplicate consecutively, with the accumulation of an average of 14 runs per measurement.

**
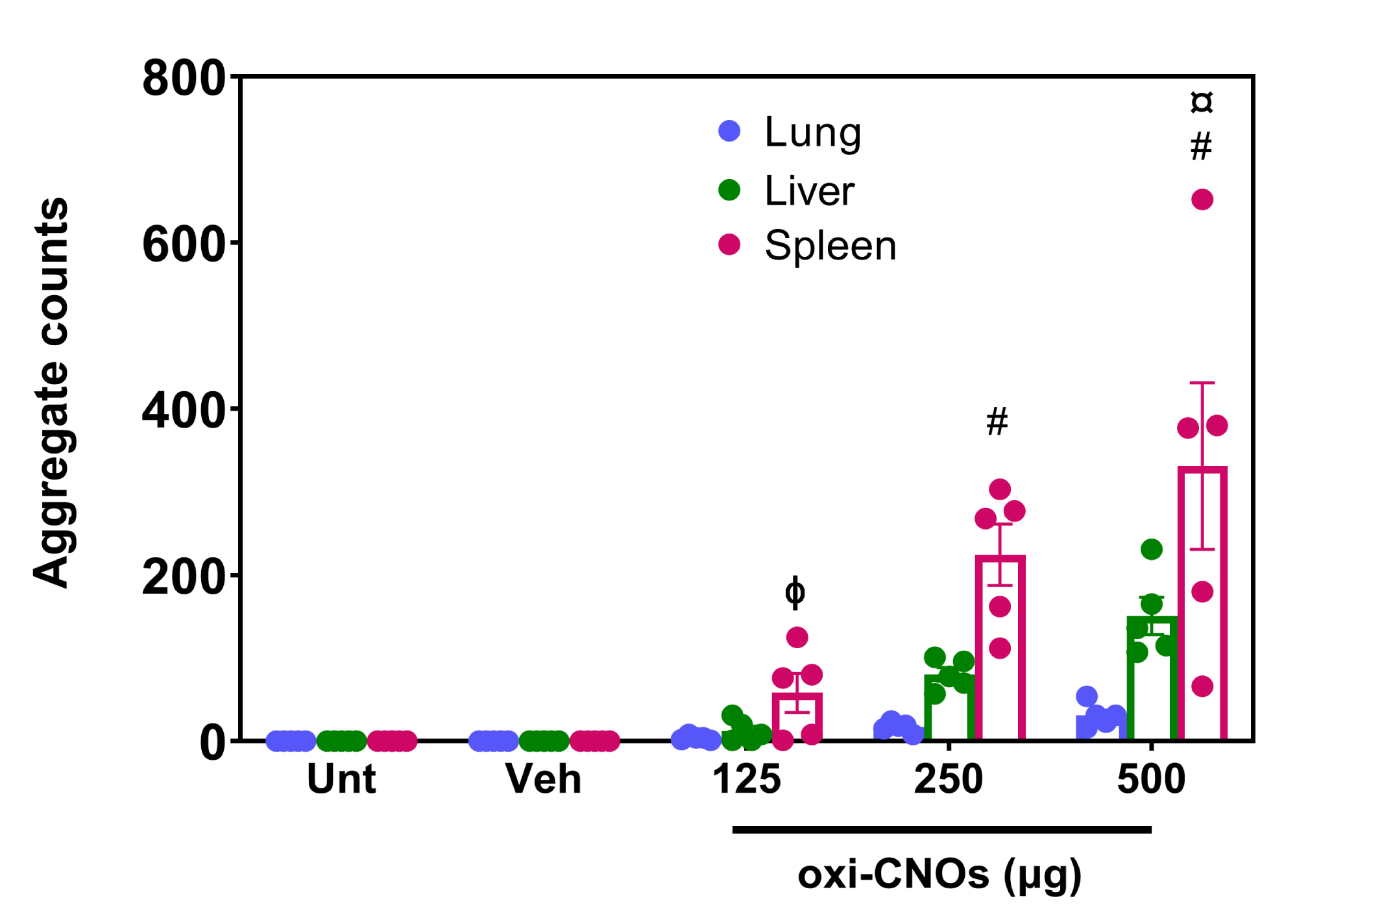
**

Figure S2: Quantification of CNO aggregates accumulated in the organs following treatment with a single dose of oxi-CNOs. Data are presented as the mean ± SEM, with n=5 mice per group. Significance was determined with a two-way ANOVA coupled with a Tukey’s *post-hoc* test. ¤significantly increased compared to all other organs at the same concentration, p<0.01. #significantly increased compared to the lung at the same concentration, p<0.001. ϕsignificantly different from all other concentrations in the same tissue, p<0.05.

Abbreviations: Unt, untreated control; Veh, vehicle control.


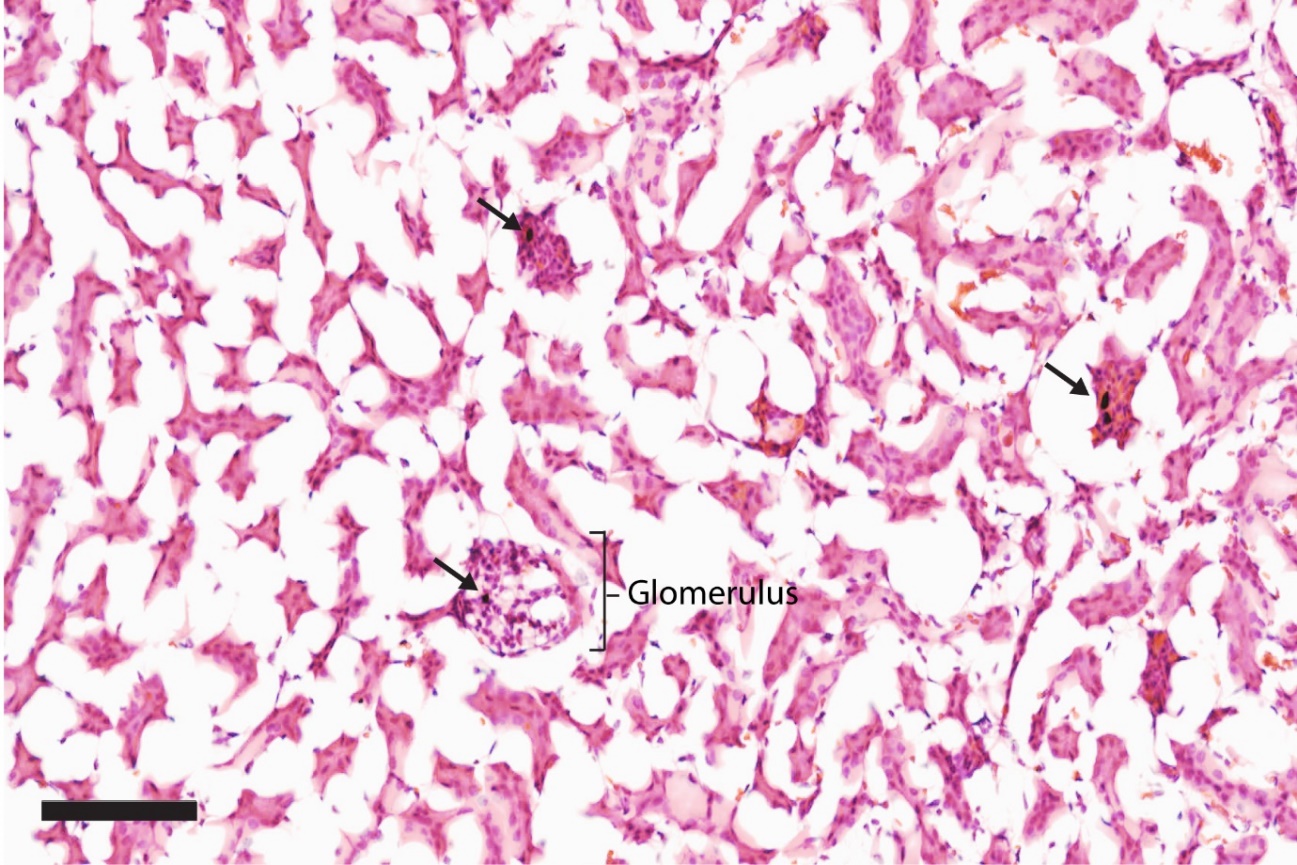


Figure S3: H&E staining of kidney section. Kidney section (12 µm) from mice following treatment with three iv doses of 500 µg oxi-CNOs. The accumulation of CNO aggregates is indicated with black arrows. The representative images from n=5 mice per group are shown. Images are shown at 20x magnification. Scale bar, 100 µm.
